# Supplementary material
Source: PubMed Central journal article supplement (PMC137837)

### WT/ Y638A hPCAF Inhibition by H3-(Me)CoA-20

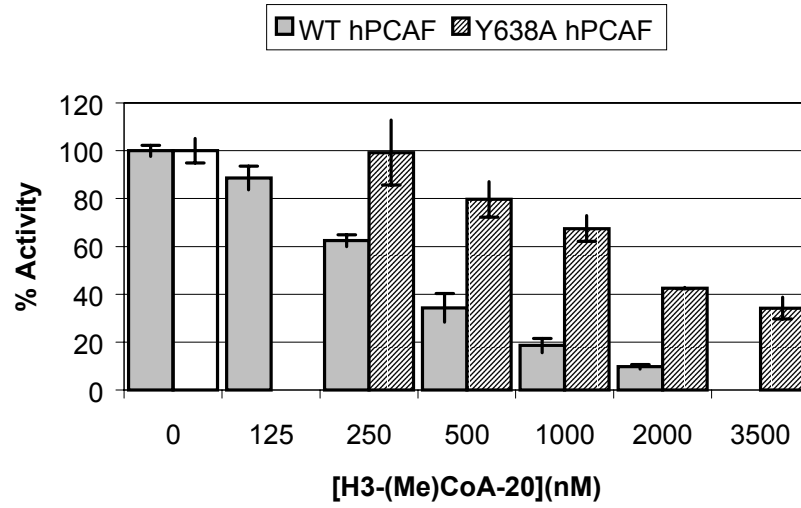

Supplement: pnas_222373899_4.pdf [file pnas_222373899_4.pdf]

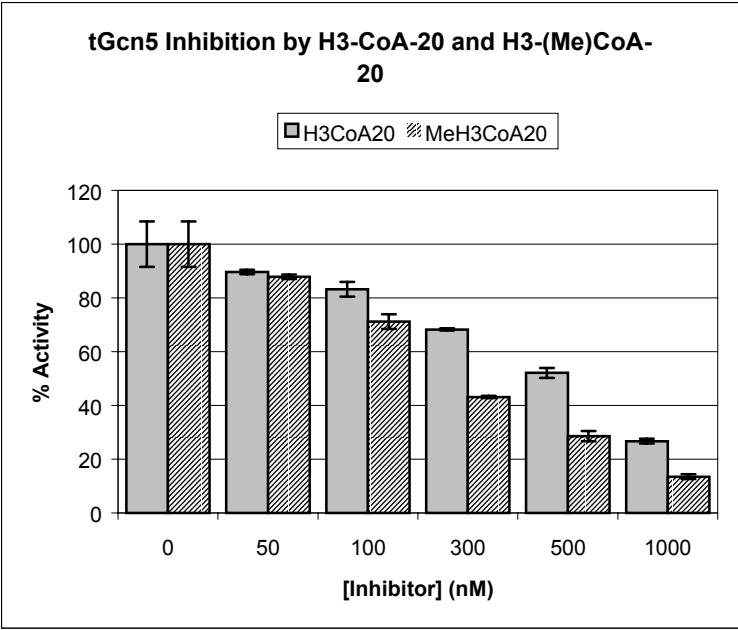

Supplement: pnas_222373899_5.pdf [file pnas_222373899_5.pdf]
